# Supplementary material for: Crucial Role of Juvenile Hormone Receptor Components Methoprene-Tolerant and Taiman in Sexual Maturation of Adult Male Desert Locusts
Source: MDPI journal article supplement (doi:10.3390/biom11020244), 2021-02-09
Supplement: s1 [file s1]

|           | cov    | pid    | 1                                                                                | : | 80 |
|-----------|--------|--------|----------------------------------------------------------------------------------|---|----|
| 1 SgMet   | 100.0% | 100.0% | -----                                                                            |   |    |
| 2 LmMet   | 98.1%  | 84.5%  | -----                                                                            |   |    |
| 3 BgMet   | 51.3%  | 27.5%  | -----                                                                            |   |    |
| 4 PkMet   | 84.3%  | 16.3%  | -----MGWHTATATAPPSTGIAFSSGNSRSRSHSHGHNNNG                                        |   |    |
| 5 TcMet   | 45.3%  | 19.7%  | -----                                                                            |   |    |
| 6 HaMet   | 42.5%  | 14.0%  | -----                                                                            |   |    |
| 7 DmMet   | 58.5%  | 17.5%  | -----                                                                            |   |    |
| 8 DmGCE   | 63.1%  | 13.8%  | MEGASRSRNSSTSHSQGRGQDIEDLKQDIPYFDEPPALDADLLVLGKSECQLDELAWDRDADGDADAPLETAPAVDLEED |   |    |
| 9 AaMet   | 72.5%  | 17.6%  | -----                                                                            |   |    |
| 10 DmaMet | 64.2%  | 15.9%  | -----                                                                            |   |    |

|           | cov    | pid    | 81                                                                              | 1 | : | 160                                       |
|-----------|--------|--------|---------------------------------------------------------------------------------|---|---|-------------------------------------------|
| 1 SgMet   | 100.0% | 100.0% | -----                                                                           |   |   |                                           |
| 2 LmMet   | 98.1%  | 84.5%  | -----                                                                           |   |   | -----MIS                                  |
| 3 BgMet   | 51.3%  | 27.5%  | -----                                                                           |   |   | -----AETDEAEVLG                           |
| 4 PkMet   | 84.3%  | 16.3%  | GSAARSTSSMYTSYGGASGYPSMATTAEVGLAAMGRITDSASATAYRMTPSLQALPPPPSPSSSTTSSSSPLMYPPVT  |   |   |                                           |
| 5 TcMet   | 45.3%  | 19.7%  | -----                                                                           |   |   |                                           |
| 6 HaMet   | 42.5%  | 14.0%  | -----                                                                           |   |   | -----MTSSGGASTHLGMHSAMASQIGLGAPPNEFGLSVGV |
| 7 DmMet   | 58.5%  | 17.5%  | -----                                                                           |   |   | -----MA                                   |
| 8 DmGCE   | 63.1%  | 13.8%  | NYPDENESSVLGSDYAPSGSGSGANSFYQSPTPSATGSGCDLMLRPPSNSMYHFNYRSPGSPMPVAPGVTSRGLHPYAH |   |   |                                           |
| 9 AaMet   | 72.5%  | 17.6%  | -----                                                                           |   |   | -----MQRSGPSSVATTT                        |
| 10 DmaMet | 64.2%  | 15.9%  | -----                                                                           |   |   |                                           |

|           | cov    | pid    | 161                                                                             | 2 | : | 240                    |
|-----------|--------|--------|---------------------------------------------------------------------------------|---|---|------------------------|
| 1 SgMet   | 100.0% | 100.0% | -----                                                                           |   |   |                        |
| 2 LmMet   | 98.1%  | 84.5%  | WEHYVP-----PPPPD-----VYHELCPV-----                                              |   |   |                        |
| 3 BgMet   | 51.3%  | 27.5%  | ADEVSE-----NTAPT-----TTTSANQVQQQQSQPQQQL-----                                   |   |   |                        |
| 4 PkMet   | 84.3%  | 16.3%  | SPHDYNHHLRNPYGYIDCRATAAVAAAAAAN-----MPQSSSSLYMAHNEYPPMTAN-----                  |   |   |                        |
| 5 TcMet   | 45.3%  | 19.7%  | -MDSGD-----CETEED-----SAPEACVSPGSLPSN-----                                      |   |   |                        |
| 6 HaMet   | 42.5%  | 14.0%  | APTMGY-----DIQATHSGD-----SSSDSHSPGMTAKASD-----                                  |   |   |                        |
| 7 DmMet   | 58.5%  | 17.5%  | APETGN-----TGSTGSAGSTG-----SGSGSGSGSGSSDPAN-----                                |   |   |                        |
| 8 DmGCE   | 63.1%  | 13.8%  | SPAHGNNPPGFYPNMWYPNAPYGSAGAAGSAGGAVSGGRYMGYGGVPGGTNSGPGAGPGAMQAAYPGHSAHMHALHHQY |   |   |                        |
| 9 AaMet   | 72.5%  | 17.6%  | ATEPGE-----KLDASTSAG-----NNSASKYDCEDSKAAACKILN-----                             |   |   |                        |
| 10 DmaMet | 64.2%  | 15.9%  | -----                                                                           |   |   | -----MDKMSSETLPSS----- |

|           | cov    | pid    | 241                                                                           | bHLH  | 320   |
|-----------|--------|--------|-------------------------------------------------------------------------------|-------|-------|
| 1 SgMet   | 100.0% | 100.0% | -----                                                                         | ----- | ----- |
| 2 LmMet   | 98.1%  | 84.5%  | -----                                                                         | ----- | ----- |
| 3 BgMet   | 51.3%  | 27.5%  | -----                                                                         | ----- | ----- |
| 4 PkMet   | 84.3%  | 16.3%  | -----                                                                         | ----- | ----- |
| 5 TcMet   | 45.3%  | 19.7%  | -----                                                                         | ----- | ----- |
| 6 HaMet   | 42.5%  | 14.0%  | -----                                                                         | ----- | ----- |
| 7 DmMet   | 58.5%  | 17.5%  | -----                                                                         | ----- | ----- |
| 8 DmGCE   | 63.1%  | 13.8%  | PQPHPHAHHPQHHPHSPHPHHPHETMMEMFQLSNSGREARNRAEKNRDKNQSGIQEISTMVPHVAESPRRVOKTAVL | ----- | ----- |
| 9 AaMet   | 72.5%  | 17.6%  | -----                                                                         | ----- | ----- |
| 10 DmaMet | 64.2%  | 15.9%  | -----                                                                         | ----- | ----- |

|           | cov    | pid    | 321   | bHLH  | PAS   | 400   |
|-----------|--------|--------|-------|-------|-------|-------|
| 1 SgMet   | 100.0% | 100.0% | ----- | ----- | ----- | ----- |
| 2 LmMet   | 98.1%  | 84.5%  | ----- | ----- | ----- | ----- |
| 3 BgMet   | 51.3%  | 27.5%  | ----- | ----- | ----- | ----- |
| 4 PkMet   | 84.3%  | 16.3%  | ----- | ----- | ----- | ----- |
| 5 TcMet   | 45.3%  | 19.7%  | ----- | ----- | ----- | ----- |
| 6 HaMet   | 42.5%  | 14.0%  | ----- | ----- | ----- | ----- |
| 7 DmMet   | 58.5%  | 17.5%  | ----- | ----- | ----- | ----- |
| 8 DmGCE   | 63.1%  | 13.8%  | ----- | ----- | ----- | ----- |
| 9 AaMet   | 72.5%  | 17.6%  | ----- | ----- | ----- | ----- |
| 10 DmaMet | 64.2%  | 15.9%  | ----- | ----- | ----- | ----- |

|           | cov    | pid    | 401   | PAS   | 480   |
|-----------|--------|--------|-------|-------|-------|
| 1 SgMet   | 100.0% | 100.0% | ----- | ----- | ----- |
| 2 LmMet   | 98.1%  | 84.5%  | ----- | ----- | ----- |
| 3 BgMet   | 51.3%  | 27.5%  | ----- | ----- | ----- |
| 4 PkMet   | 84.3%  | 16.3%  | ----- | ----- | ----- |
| 5 TcMet   | 45.3%  | 19.7%  | ----- | ----- | ----- |
| 6 HaMet   | 42.5%  | 14.0%  | ----- | ----- | ----- |
| 7 DmMet   | 58.5%  | 17.5%  | ----- | ----- | ----- |
| 8 DmGCE   | 63.1%  | 13.8%  | ----- | ----- | ----- |
| 9 AaMet   | 72.5%  | 17.6%  | ----- | ----- | ----- |
| 10 DmaMet | 64.2%  | 15.9%  | ----- | ----- | ----- |

|    |        | cov    | pid    | 481                                                                                                                                                         | 5      | 560 |
|----|--------|--------|--------|-------------------------------------------------------------------------------------------------------------------------------------------------------------|--------|-----|
| 1  | SgMet  | 100.0% | 100.0% | R P C T S A S T S V G S S D G R A G L G G L F G S A G A A E H H R S F Y I L A Q R A G R A A C S G S A T A G A G G G G G G G G G A A C Q G                   |        |     |
| 2  | LmMet  | 98.1%  | 84.5%  | R P C T S A S T S V G S S D G R T P G G P F G S A G A E H L R R S F Y I L A Q R A G R A A S S A S G T G G S S G G G S G G G G S V G V A C Q G               |        |     |
| 3  | BgMet  | 51.3%  | 27.5%  | H Q Q S A P S S T S T A V A V P E A P S E P L R R R S F Y L R L S Q A V S R S                                                                               |        |     |
| 4  | PkMet  | 84.3%  | 16.3%  | CT L V E R R R S F C L R R H R C L A R S E Q P                                                                                                              |        |     |
| 5  | TcMet  | 45.3%  | 19.7%  | D W K K C F N I R K R A G P R T E S A                                                                                                                       |        |     |
| 6  | HaMet  | 42.5%  | 14.0%  | S C D S R L F E H H N F H I R M M R A G A R S D P A                                                                                                         |        |     |
| 7  | DmMet  | 58.5%  | 17.5%  | Q G E A D D D E D H P Y N R R T P S P R M A H L A T I D D R L R M D R R C F T V R L A R A S T R A E I T R                                                   |        |     |
| 8  | DmGCE  | 63.1%  | 13.8%  | R S K A E E D A I D R K L R E D R R S F R V R L A R A G P R S E P T                                                                                         |        |     |
| 9  | AaMet  | 72.5%  | 17.6%  | Q R K S Q D E E D E I D R K L R Q D R R K F T L R I A R A G P R S E P T                                                                                     |        |     |
| 10 | DmaMet | 64.2%  | 15.9%  | A D G Q V S F E C R L A G R Q L S R G E P T                                                                                                                 |        |     |
|    |        | cov    | pid    | 561                                                                                                                                                         | 6      | 640 |
| 1  | SgMet  | 100.0% | 100.0% | A E Q T T Y E L V H F L G Y Q V R S H E P P P A T H R R R H R D T V P S S N S D N V                                                                         |        |     |
| 2  | LmMet  | 98.1%  | 84.5%  | A E Q T T Y E L V H F L G Y Q V R S H P P P A T H R R R H R D T V P S S N S D N V                                                                           |        |     |
| 3  | BgMet  | 51.3%  | 27.5%  | E T T Q Y E L V H L G H L R V P Q R P N P G S Q S R T R R Q R E G S S T G S S A D S D T V                                                                   |        |     |
| 4  | PkMet  | 84.3%  | 16.3%  | Q Y E P M H L N G F R V E K K Y T C Q A Q K S R K C K G E M T A T N S N E I L                                                                               |        |     |
| 5  | TcMet  | 45.3%  | 19.7%  | V Y E P R I M G V H R P G F D N D C N K N T S T S                                                                                                           |        |     |
| 6  | HaMet  | 42.5%  | 14.0%  | R Y E R C R I D G I R R S D K A T S N G V Q D E Q I I R R R V R T N R T F S S S G N D V V                                                                   |        |     |
| 7  | DmMet  | 58.5%  | 17.5%  | H Y E R K I D G C F R R S D S L T G G A A N Y I V S Q L I R R S R N N M L A A A A A V A A E A A T V P P Q H D A I A Q A A L H G T S G N D I V               |        |     |
| 8  | DmGCE  | 63.1%  | 13.8%  | A Y E V K I D G C F R R S D E A P R G V R S N F S S N L Q L I R R T R G R D D V I P L H T I S G N D I I                                                     |        |     |
| 9  | AaMet  | 72.5%  | 17.6%  | A Y E L V T I D G F F R R A D A A P R G E R P S G S G L Q L L R R A R G R D D G I T L Q S I N G N D I V                                                     |        |     |
| 10 | DmaMet | 64.2%  | 15.9%  | V Y E R V S V G T F R G R R R R D W A D L K S S D R S V A T V Q Q H N D Y S E P L                                                                           |        |     |
|    |        | cov    | pid    | 641                                                                                                                                                         | PAS-11 | 720 |
| 1  | SgMet  | 100.0% | 100.0% | L V A V I Q L F R E K K V E L S L L E T D E Y Q T R H K D G S I V S D H R S V V A G Y L A D E V H G H N A F T F H Q D D I A Y                               |        |     |
| 2  | LmMet  | 98.1%  | 84.5%  | L V A V I Q L F R E K K V E L S L L E T D E Y Q T R H K D G S I V S S D H R S V V A G Y L T D E V H M A F T F H Q D D I A Y                                 |        |     |
| 3  | BgMet  | 51.3%  | 27.5%  | L I A V R T V R E S S L V E R S L L L E P S K D E Y V T R H I D G R I T I Y S D H R S V V A G Y M A E E V A G L S A F K F M K D D I R F                     |        |     |
| 4  | PkMet  | 84.3%  | 16.3%  | L V A V M K P A R E E T L M S I V E S Q E Y V T R H M Y O G R I V F C D Q R S L V S G Y L P E E V K G L Q A L Q F M A K E E V H W                           |        |     |
| 5  | TcMet  | 45.3%  | 19.7%  | L L F F V K V F R P E P L C E R L F E S R E E Y V T R H I D G R I G D Q Q R S F I A G Y M T E E V S G L S A F K F M R E D V R W                             |        |     |
| 6  | HaMet  | 42.5%  | 14.0%  | F I G M I H V L S S A M P P R I L P P T A Y S E Y A T R H I D G R I V Q C D Q S L A I G Y M T E E V T G T S A F V F M K D D V R W                           |        |     |
| 7  | DmMet  | 58.5%  | 17.5%  | L V A M A R V L R E E R P P E T E G T V G L T I Y R O P E P Y Q L E Y A T R H I D G S I I D Q Q R G L V A G Y M K D E V R N L S P F F M H D D V R W         |        |     |
| 8  | DmGCE  | 63.1%  | 13.8%  | L T G C A R I I R P P K I A S R I I D A N T L E Y K T R H I D G R I D C Q R G I V A G Y M T D E V R N L S P F T F M H D D V R W                             |        |     |
| 9  | AaMet  | 72.5%  | 17.6%  | L V A V A R V Q K V P T I C D R L I E A C R Y E Y K T R H I D G R I V Q C D H R S V V A G Y L T T E V S G L S P F T F M H D D V R W                         |        |     |
| 10 | DmaMet | 64.2%  | 15.9%  | F I G L V R I L Q T P N T L P P L T I M A V Q D E Y A T Q T T G G T I I Q T D H R A I I A G Y L S G E V T G M S A Y D V V Y S E D L E Y                     |        |     |
|    |        | cov    | pid    | 721                                                                                                                                                         | 8      | 800 |
| 1  | SgMet  | 100.0% | 100.0% | A L I A L Q Q F D K N E F G S S T Y R L Y T K N Q Y Y R T R G Y L E F A H G S K D V E T F L C I N T L S K E E E D G L R E N K O R F S A Y Y S A             |        |     |
| 2  | LmMet  | 98.1%  | 84.5%  | A L I A L Q Q F D K N E F G S S T Y R L Y T K N Q Y Y R T R G Y L E A P E S K E V E T F L C I N T L S K E E E E G L R E N K O R F S A Y Y S A               |        |     |
| 3  | BgMet  | 51.3%  | 27.5%  | T M I A L R Q M Y D R G K D S Y G S S C Y R L Q S K I T Q Y I Y L R T H G Y L E Y D K D T Q Q I V S F I C I N T L T E E E E R R I C E N K A R F S A T I T   |        |     |
| 4  | PkMet  | 84.3%  | 16.3%  | V M I A L R Q M L W N R E G F G K S C Y R L K R K N D F I Y V T H G Y L E P C E D L Q K S T F V C V N T L V S E E G L R E I R N M K K K F T P I E R         |        |     |
| 5  | TcMet  | 45.3%  | 19.7%  | V M I A L R Q M Y D R G E S K G S S C Y R L L S R N Q F I Y L R T F G F L E I D D Q G T V E S F V C V N T L V S E Q E G L Q L I N E N K M R Y S A L I N S   |        |     |
| 6  | HaMet  | 42.5%  | 14.0%  | V C C V L R Q M Y D E S R E F G E S Y R L M T R S E H F I Y L R T F L E I D R A T K V Q S F V C V N S V I G E D Y G C R M M D E N K R K Y S V I I D V       |        |     |
| 7  | DmMet  | 58.5%  | 17.5%  | V I V A L R Q M Y D C N S D Y G E S C Y R L L S R N G R F I Y L T K G F L E V D R E S N K V H S F L C V N T L L D E A G R Q K V Q E N K E K F S T I I K A   |        |     |
| 8  | DmGCE  | 63.1%  | 13.8%  | V I V A L R Q M Y D C N S S Y G E S T Y R L F T R N G N I I Y L Q S K G Y L E I D K E T N K V H S F V C V N T L L G E E G K R R V Q E N K K K F S V I I N T |        |     |
| 9  | AaMet  | 72.5%  | 17.6%  | V I V A L R Q M Y D Y S Q N Y G E S C Y R L M T R T G D F V Y L K T R G Y L E V D S S K I V Q S F V C I N T L V S D E E G R R L V R E N K H K F S V I V E A |        |     |
| 10 | DmaMet | 64.2%  | 15.9%  | T I K A Q S L M L T R S E G M V T Y R L K I T S T E R L F L R S R F I Q Y D E N T K E I V S F C I N S L I D E E Q G M K M E Q E M R A M L D K L N I A       |        |     |
|    |        | cov    | pid    | 801                                                                                                                                                         | 9      | 880 |
| 1  | SgMet  | 100.0% | 100.0% | L R A A G A D S L A G I A A A M S A A P P P P R M V K G S E L P K L P P P P P P P P S L Q S S S P L P P P P P P P P P P P P A A I T S S S E                 |        |     |
| 2  | LmMet  | 98.1%  | 84.5%  | L R A A G A D S L T G I A A A A A A P P P P R S S A V T A S E R P T L A P P P P P P P P P L Q S S S P P P P P P P P P P P P A A N S S S E                   |        |     |
| 3  | BgMet  | 51.3%  | 27.5%  | R D E P A I A A I A E K Y F V R M Q                                                                                                                         |        |     |
| 4  | PkMet  | 84.3%  | 16.3%  | Q S C P I T S                                                                                                                                               |        |     |
| 5  | TcMet  | 45.3%  | 19.7%  | D K Q Q T E                                                                                                                                                 |        |     |
| 6  | HaMet  | 42.5%  | 14.0%  | E M P T Q                                                                                                                                                   |        |     |
| 7  | DmMet  | 58.5%  | 17.5%  | Q I P                                                                                                                                                       |        |     |
| 8  | DmGCE  | 63.1%  | 13.8%  | D E L P D                                                                                                                                                   |        |     |
| 9  | AaMet  | 72.5%  | 17.6%  | T V T P A I A S                                                                                                                                             |        |     |
| 10 | DmaMet | 64.2%  | 15.9%  |                                                                                                                                                             |        |     |
|    |        | cov    | pid    | 881                                                                                                                                                         | 9      | 960 |
| 1  | SgMet  | 100.0% | 100.0% | I I I N S T L C E V S P P F T A M V T E S A A S S E Q S A D F G S V S R S E A A A S K Y R N Q A P T A A S R S P T V D P Y                                   |        |     |
| 2  | LmMet  | 98.1%  | 84.5%  | I I I S N T I V C E V S P P F T A M V T E S T P S S E Q G A D F G S V S P S E A A A S K Y R N H T T T S R S P T A D P Y                                     |        |     |
| 3  | BgMet  | 51.3%  | 27.5%  | S S R Q Q A I L G S T S T S V G N D                                                                                                                         |        |     |
| 4  | PkMet  | 84.3%  | 16.3%  | G R N V P D L N P T T E D P D E L K N A L K A V T N I P P P I E V K E D P E Q C R E T Q F A K Y K Y S K T L P P P T I P T G                                 |        |     |
| 5  | TcMet  | 45.3%  | 19.7%  | S G S T D S S S Q S V E D P Q Q V E A I V H L I A N L P S P G                                                                                               |        |     |
| 6  | HaMet  | 42.5%  | 14.0%  | P P I D D A P Y E H P K R L E R I M H L V E P S V N E N                                                                                                     |        |     |
| 7  | DmMet  | 58.5%  | 17.5%  | S S S P D L P A S Q A P Q O L E R I V L Y L I E N L Q S                                                                                                     |        |     |
| 8  | DmGCE  | 63.1%  | 13.8%  | Q S I D P A S E H P A L L E K A V L R L I Q N L Q S G E N G G H D D G E D D D A Q D G D D                                                                   |        |     |
| 9  | AaMet  | 72.5%  | 17.6%  | E S D E P A V E N P T Q I E K A V L N L L T N L H S E D E P S E R A L P S N T S Q E T G S E G S Q L A I A P S K A V K S A I                                 |        |     |
| 10 | DmaMet | 64.2%  | 15.9%  | S P T S T E P V G A S T Q E P L S R C V R A S V G K P P P S F S S N G C H L N G S R V S G                                                                   |        |     |

|           | cov    | pid    | 961                       | 0                      | 1040                               |
|-----------|--------|--------|---------------------------|------------------------|------------------------------------|
| 1 SgMet   | 100.0% | 100.0% |                           |                        | LPAA R PRAV SEG DTT F N QN         |
| 2 LmMet   | 98.1%  | 84.5%  |                           |                        | LPAA R PRAV SEG DTT AIS QN         |
| 3 BgMet   | 51.3%  | 27.5%  |                           |                        |                                    |
| 4 PkMet   | 84.3%  | 16.3%  |                           |                        | KVITVMEKTASP SPAPST                |
| 5 TcMet   | 45.3%  | 19.7%  |                           |                        |                                    |
| 6 HaMet   | 42.5%  | 14.0%  |                           |                        |                                    |
| 7 DmMet   | 58.5%  | 17.5%  |                           |                        | VDSAETVGGQGMSLMDDG                 |
| 8 DmGCE   | 63.1%  | 13.8%  |                           |                        | EEDDDDDQDDGARSMSFEGDP              |
| 9 AaMet   | 72.5%  | 17.6%  | VKSMNVIAIASKKMSNGSNSPLRDS | TGASPRSKDHSGSPSAITMQRP | SVLQKAHSPA ESRV PPLHGTDD FFIQPFSPA |
| 10 DmaMet | 64.2%  | 15.9%  |                           |                        | LPSSIMPNGHNSLCISP                  |

|           | cov    | pid    | 1041                                                                                                                                                        | 1 | 1120                                                       |
|-----------|--------|--------|-------------------------------------------------------------------------------------------------------------------------------------------------------------|---|------------------------------------------------------------|
| 1 SgMet   | 100.0% | 100.0% | F V S L F K V P E E E E N S V E Q L S P L A N S T G I T T D L E E K E Q L R N P L S P S S P P S R R H Y T A A Q R R A A S E S E L Q T A N S G S T F T Q S D |   |                                                            |
| 2 LmMet   | 98.1%  | 84.5%  | F V N L F K V P E E E E H S V D V Q R S P L V N T E V I S D L E E K P R I T N S L S P S S P P S R R H Y A A A Q R R A A S E S E L Q A A N S G S T F T Q S D |   |                                                            |
| 3 BgMet   | 51.3%  | 27.5%  |                                                                                                                                                             |   | NDQLEVAISOLISNIPEVRDNKEPSNLPTQYAKAVRYSKVLPSATEQAKVGIKVPIN  |
| 4 PkMet   | 84.3%  | 16.3%  | SSKRDRLSPLPVSTSAAYGTTATNSASMGSPSPSPSPSSSSSQCQHAVVSPSSMAALSPCGAALSRTSFQNRPSVLRI                                                                              |   |                                                            |
| 5 TcMet   | 45.3%  | 19.7%  |                                                                                                                                                             |   | SDQRSTSPSRVYGNVNEQDCSTPTENSPTKPYKLTANNKRPSTELGTNIYTSKQRSTS |
| 6 HaMet   | 42.5%  | 14.0%  |                                                                                                                                                             |   | IDELQLVPPSKENIISAQNSKVVQETGVRFDSRKRKVDCCDN                 |
| 7 DmMet   | 58.5%  | 17.5%  | YSSPANTLTLEELAPSPPTALALVPPAPSSVKSSISKS                                                                                                                      |   | VGVVNVTAARKFQEQHQQRERDREQLKERTNS                           |
| 8 DmGCE   | 63.1%  | 13.8%  | YGSHHGRSHHGSSALSSHGHGNAKTPPLALVPPASSVKSAITKS                                                                                                                |   | ISVVNVTAAKHLRGIHASTAVKSPSSLGSCCTS                          |
| 9 AaMet   | 72.5%  | 17.6%  | GSTSSSSSSSGSVFSPASHQRNSRSPFGGSIPPTSPPAIAATPSTSVSRIVDNTASGHSRSISVLKRTHSASCLDSSDGS                                                                            |   |                                                            |
| 10 DmaMet | 64.2%  | 15.9%  | SSE L Q V S S G S S S F S E E R C S S T P H S L V S S P M E I P N L V A S Y P F A P I P F W R P S T D C S P I T T T S N G H V N T R E V S K S P D           |   |                                                            |

|           | cov    | pid    | 1121                                                                                                                                                    | 2 | 1200                                        |
|-----------|--------|--------|---------------------------------------------------------------------------------------------------------------------------------------------------------|---|---------------------------------------------|
| 1 SgMet   | 100.0% | 100.0% | P A S R G G N W Q F R P C D M P H S G T T E R R P P E R T V I T G R C C A G S E R K C S R L S V M S V T D E K R I T S V R G E T V L K R T S A D V E     |   |                                             |
| 2 LmMet   | 98.1%  | 84.5%  | P A D R C S N W Q F R P C D V S H S G T T D R R P P E R T V I T G R C C A G S E R R C S R L S I S V T G E E K R I T S V H G E V L K R T S A D E E       |   |                                             |
| 3 BgMet   | 51.3%  | 27.5%  |                                                                                                                                                         |   | ARTEPISPTPLVTIIEPQRHP                       |
| 4 PkMet   | 84.3%  | 16.3%  | APA R Q A V N S V S A T V A D N Y A I S S T S N F D G K A T N D D A G R K Y S A S F C G S P A A A V A G T G S V R G S T N C D F I K Q E C A I K Q E A V |   |                                             |
| 5 TcMet   | 45.3%  | 19.7%  |                                                                                                                                                         |   |                                             |
| 6 HaMet   | 42.5%  | 14.0%  |                                                                                                                                                         |   |                                             |
| 7 DmMet   | 58.5%  | 17.5%  |                                                                                                                                                         |   | T-----QGV-----IRQLSSCLSEAEATA-----SCIL----- |
| 8 DmGCE   | 63.1%  | 13.8%  | DSHSPCDFCQGAFTTDLQAVGSNLKRGSTAHVETEELSKRRFIPSTEIEHVLHTSLDQIGRNLTTQQL                                                                                    |   |                                             |
| 9 AaMet   | 72.5%  | 17.6%  | SIGHTADFVVQKRPKINTILDLDTCRRLSNPATDLITMLPQAFHAVDQSLKLVDDDTAKLRAQVSGY                                                                                     |   |                                             |
| 10 DmaMet | 64.2%  | 15.9%  | VDQSDPLGEPGLLALTLDHQWETAPNSQSMIVQHNG                                                                                                                    |   |                                             |

|           | cov    | pid    | 1201                                                                                                                            | 1280                                   |
|-----------|--------|--------|---------------------------------------------------------------------------------------------------------------------------------|----------------------------------------|
| 1 SgMet   | 100.0% | 100.0% | N S T T K K L N V G P R Y C R Q R H R E H P P T E A L S V E N T L P P D E L Q H I L S R D S G M Y N S O P T V L V S Q H S L F R | TS                                     |
| 2 LmMet   | 98.1%  | 84.5%  | N S C T K K L N V G P R H C R Q R H R E H P P T E A L S V E N T L P P D E L Q H I L S R D S S O P T V L V S Q H R P F R         | TS                                     |
| 3 BgMet   | 51.3%  | 27.5%  |                                                                                                                                 | VITS LP                                |
| 4 PkMet   | 84.3%  | 16.3%  | DVDNYNDGCGVDDDDDDADADADDDDLQAIAAVIQTDSSGQLVAAMAAQAAMPVGVVSGRALKRRRLDCASSFAS                                                     |                                        |
| 5 TcMet   | 45.3%  | 19.7%  |                                                                                                                                 | QLSPMSSLPYPNRTQITEVTQQTPEPSIYQHDQLRNKV |
| 6 HaMet   | 42.5%  | 14.0%  |                                                                                                                                 | SEYLKRHSGLQDVNVDL                      |
| 7 DmMet   | 58.5%  | 17.5%  | SPASSLSASEAPDTPDPHSNTSPPSLHTRPSVLHRTLSTLR                                                                                       |                                        |
| 8 DmGCE   | 63.1%  | 13.8%  | NVARNLREQSORVELPHANQRFDIEHQKQSELYVNIKSEYEVQLQHK                                                                                 | ASTRKSSDSRNQEQ                         |
| 9 AaMet   | 72.5%  | 17.6%  | ENLQGKSLQQLDSIVEASHEQRNVLQSIKQLTQFQSNNGSNDQDGAGRGPIVVNDLPGGGAIVD                                                                | DL                                     |
| 10 DmaMet | 64.2%  | 15.9%  | QSHQQLSLVAVSPLQAHLLQSSNDNIEPIRSTLKSPPSSTSCPVQPPHYQEDALKISIPDRCPNT                                                               |                                        |

|           | cov    | pid    | 1281                                                                                                                                                  | 3 | 1360 |
|-----------|--------|--------|-------------------------------------------------------------------------------------------------------------------------------------------------------|---|------|
| 1 SgMet   | 100.0% | 100.0% | Q P A L Q T V T Q N V P A S S L S P P Q A E Q S T S V T P P S F I E E P S G L P L V L S D T N T S V G C Q D P L I S P D H G D S D S F S S L G L F D P |   |      |
| 2 LmMet   | 98.1%  | 84.5%  | Q P A L Q T V T Q N V P A V S L S P P Q A D I T P P P F V I E E P G G M P L V L S D T T S V G C Q D P L I S P D H G D S D S F S S L G L F D P         |   |      |
| 3 BgMet   | 51.3%  | 27.5%  |                                                                                                                                                       |   |      |
| 4 PkMet   | 84.3%  | 16.3%  | SIVPIKKNACHADGVAKARHQKHLAATAVPSPLPLPPSHQVSSSSSVYPYSAAAVAASASPSCNSAGSALLATTQI                                                                          |   |      |
| 5 TcMet   | 45.3%  | 19.7%  |                                                                                                                                                       |   |      |
| 6 HaMet   | 42.5%  | 14.0%  |                                                                                                                                                       |   |      |
| 7 DmMet   | 58.5%  | 17.5%  |                                                                                                                                                       |   |      |
| 8 DmGCE   | 63.1%  | 13.8%  | PPPLQEDDQD                                                                                                                                            |   |      |
| 9 AaMet   | 72.5%  | 17.6%  | DPPSLMMEFDPSSNLMAEDNNNGSLLEGDSPLEFFSSINTPLISPTTATASVITSSRSVGGTGTGASGTAGSFYQGA                                                                         |   |      |
| 10 DmaMet | 64.2%  | 15.9%  | ELSRNNCLNGYIIMQKMSPKNRKENLILSYLDVDKHAYKQPEITGTADQHYHSDLKVNAGTNSA                                                                                      |   |      |

|           | cov    | pid    | 1361                                                                                                                                          | 4 | 1440 |
|-----------|--------|--------|-----------------------------------------------------------------------------------------------------------------------------------------------|---|------|
| 1 SgMet   | 100.0% | 100.0% | E N N P E V L D L L E S E K L N F D T L Q E V R S S N E E A F S G F E T A V T E R F L A R K H L Q E S C H Q R Q E T Q H C I E H D T Q L P L A |   |      |
| 2 LmMet   | 98.1%  | 84.5%  | E N N P E V L D L L E P E K L N F D T L Q E A R S S N D E A A T G F E T A T E R I L A R K H L Q E S C H Q R Q E T Q H C I E H D T Q L P L A   |   |      |
| 3 BgMet   | 51.3%  | 27.5%  |                                                                                                                                               |   |      |
| 4 PkMet   | 84.3%  | 16.3%  | SRIDDPYTRLADIDVCDPTAQFVHNITADSFEETNQEQVLQLDNENKHRHIEESKMHIGGAQIHAEIGDKVFT                                                                     |   |      |
| 5 TcMet   | 45.3%  | 19.7%  |                                                                                                                                               |   |      |
| 6 HaMet   | 42.5%  | 14.0%  |                                                                                                                                               |   |      |
| 7 DmMet   | 58.5%  | 17.5%  |                                                                                                                                               |   |      |
| 8 DmGCE   | 63.1%  | 13.8%  |                                                                                                                                               |   |      |
| 9 AaMet   | 72.5%  | 17.6%  | DLNPS                                                                                                                                         |   |      |
| 10 DmaMet | 64.2%  | 15.9%  |                                                                                                                                               |   |      |

|           | cov    | pid    | 1441                                                    | : | . | . | . | . | ] 1499 |
|-----------|--------|--------|---------------------------------------------------------|---|---|---|---|---|--------|
| 1 SgMet   | 100.0% | 100.0% | DHFRSNLTQSGPIHRKEERQASKHIPVLTPTFMNNRSTRYC-----          |   |   |   |   |   |        |
| 2 LmMet   | 98.1%  | 84.5%  | DHFRSNLTQSGPIHRKEERQASKHIPVLTPTFMNNRSTRYC-----          |   |   |   |   |   |        |
| 3 BgMet   | 51.3%  | 27.5%  | -----                                                   |   |   |   |   |   |        |
| 4 PkMet   | 84.3%  | 16.3%  | TEQLGFQDTLTQKEQHVKQKMLMTLQQDHHSQHCNTTDGCANITSNTPTHQNVGV |   |   |   |   |   |        |
| 5 TcMet   | 45.3%  | 19.7%  | -----                                                   |   |   |   |   |   |        |
| 6 HaMet   | 42.5%  | 14.0%  | -----                                                   |   |   |   |   |   |        |
| 7 DmMet   | 58.5%  | 17.5%  | -----                                                   |   |   |   |   |   |        |
| 8 DmGCE   | 63.1%  | 13.8%  | -----                                                   |   |   |   |   |   |        |
| 9 AaMet   | 72.5%  | 17.6%  | -----                                                   |   |   |   |   |   |        |
| 10 DmaMet | 64.2%  | 15.9%  | -----                                                   |   |   |   |   |   |        |
