# Supplementary material for: Crucial Role of Juvenile Hormone Receptor Components Methoprene-Tolerant and Taiman in Sexual Maturation of Adult Male Desert Locusts
Source: MDPI journal article supplement (doi:10.3390/biom11020244), 2021-02-09
Supplement: s1 [file s1]

**Table S1.** Oligonucleotide sequences of primers used in dsRNA construct design. T7 RNA polymerase promoter sequences necessary for efficient RNA transcription are underlined.

| Target genes   | Forward primer                                                   | Reverse primer                                                    |
|----------------|------------------------------------------------------------------|-------------------------------------------------------------------|
| <i>Scg-Met</i> | 5'- <u>TAATACGACTCACTATAGGGAGA</u><br>AATGAGCCGTTTGGCAGTTCCA -3' | 5'- <u>TAATACGACTCACTATAGGGAGA</u><br>GGCGGTGCAGCACTCATAGC -3'    |
| <i>Scg-Tai</i> | 5'- <u>TAATACGACTCACTATAGGGAGA</u><br>TCGGAGAATGTGGAGCAGTT-3'    | 5'- <u>GAAATTAATACGACTCACTATAGGGCC</u><br>AGGTCACCACTCTCAGAACG-3' |
| <i>GFP</i>     | 5'- <u>TAATACGACTCACTATAGGGAGA</u><br>AAGGTGATGCTACATACGGAA-3'   | 5'- <u>TAATACGACTCACTATAGGGAGA</u><br>ATCCCAGCAGCAGTTACAAAC-3'    |

**Abbreviations:** *Scg* = *Schistocerca gregaria*, Met = Methoprene-tolerant, Tai = Taiman, GFP = Green Fluorescent Protein.

**Table S2.** Oligonucleotide sequences of primers used in q-RT-PCR.

| Reference genes | Forward primer                  | Reverse primer              |
|-----------------|---------------------------------|-----------------------------|
| <i>Scg-Act</i>  | 5'-AATTACCATTTGGTAACGAGCGATT-3' | 5'-TGCTTCCATACCCAGGAATGA-3' |
| <i>Scg-EF1α</i> | 5'-GATGCTCCAGGCCACAGAGA-3'      | 5'-TGCACAGTCGGCCTGTGAT-3'   |

  

| Target genes       | Forward primer                 | Reverse primer                |
|--------------------|--------------------------------|-------------------------------|
| <i>Scg-Met</i>     | 5'-GGTGCCTGAAGAGGAAGAAA-3'     | 5'-ATGGAGGTGATGAAGGAGAAAG-3'  |
| <i>Scg-Tai</i>     | 5'-GCCAGCTTTGCTGACATGAA-3'     | 5'-GGAGGATGGCGCACTTGT-3'      |
| <i>Scg-Krh1</i>    | 5'-CTCCAAGACGTTTCATCCAGAG-3'   | 5'-TGCTTGGAGCAGGTGAAG-3'      |
| <i>Scg-E93</i>     | 5'-CGCAAGCAGACATAGAACCC-3'     | 5'-TGGTCTCAGGAACATCCAC-3'     |
| <i>Scg-NP3</i>     | 5'-GCGGAATCGGCATGGA-3'         | 5'-TCACAGAGCAACCGGAACATT-3'   |
| <i>Scg-NP4</i>     | 5'-TGGCGACTCTCCAGTGCTT-3'      | 5'-TGACACATTATTCTCTTCTGACA-3' |
| <i>Scg-IRP</i>     | 5'-CCGTGGCAACTACAACACCAT-3'    | 5'-TCCGCGTCCGACACATCT-3'      |
| <i>Scg-JHAMT</i>   | 5'-CGGAGCAAAGGCAAGCA-3'        | 5'-CCACTTCACCGCCTGGTTT-3'     |
| <i>Scg-Cyp15A1</i> | 5'-AAAGCAACTTCATCATTACAGATG-3' | 5'-CAGAGCCAGCCATGAACAAA-3'    |
| <i>Scg-YP</i>      | 5'-ACGACAACACCACGGAAAAC-3'     | 5'-TGAAGGTGTCGCTATTGGTG-3'    |

**Abbreviations:** *Scg* = *Schistocerca gregaria*, Act = actin, Ef1a = elongation factor 1-alpha, Met = Methoprene-tolerant, Tai = Taiman, Krh1 = Krüppel-homolog 1, NP = neuroparsin, IRP = insulin-related peptide, JHAMT = JH acid O-methyltransferase, Cyp15A1 = methyl farnesoate epoxidase, YP = yellow protein.

**Table S3.** List of species and accession numbers of protein sequences used in the phylogenetic analyses.

| Species                         | Accession number Met | Accession number Tai |
|---------------------------------|----------------------|----------------------|
| <i>Schistocerca gregaria</i>    | NA                   | NA                   |
| <i>Locusta migratoria</i>       | AHA42531.1           | ANG56297.1           |
| <i>Planococcus kraunhiae</i>    | BAU79435.1           | BAU79451.1           |
| <i>Blatella germanica</i>       | CDO33887.1           | CDO33883.1           |
| <i>Drosophila melanogaster</i>  | Met: NP_511126.2     | ADV36996.1           |
|                                 | GCE: AAF48439.2      |                      |
| <i>Aedes aegypti</i>            | AAW82472.1           | AXN70147.1           |
| <i>Tribolium castaneum</i>      | NP_001092812.1       | /                    |
| <i>Helicoverpa armigera</i>     | AJW29006.1           |                      |
| <i>Macrobrachium nipponense</i> | /                    | QLJ57681.1           |
| <i>Daphnia magna</i>            | BAM83855.1           | /                    |
