# Supplementary material for: Crucial Role of Juvenile Hormone Receptor Components Methoprene-Tolerant and Taiman in Sexual Maturation of Adult Male Desert Locusts
Source: MDPI journal article supplement (doi:10.3390/biom11020244), 2021-02-09
Supplement: s1 [file s1]

MSTVIAENAGLGPCDLQDPVWVKMSAAVTGGASKRKKTDTKSSAQVTKCLNEKRRRDQENTFYEELAEIAASFADM  
NSLSVKPDKCAILQETVTQIRRIKEQEGASSDAIQQGEVSSSKPTILANEVLGPILLQALDGLFVVNKDCHVEYVSENVEQ  
FIKYTKEDILGKSIYNFMHVGDTRFSSILLPITSTAWSGEHQPHRNRNTINCRLLIKPPDDADETMEEKQQRISKYEYMQIS  
STLLPYPSDRSESGDLSEIDSSPCLMCVARRIPQNEKSLPNAVEQFSMKLDVHGKIVGVDTTNISPSYSQFLNKDLAGRVI  
QDLCHQQDLQKLTSHLREAVQTGHNTSKIYRLRVKTPDKYIQVQTKSRLFQNPNDQEDFIMATHSIIGDSENPLPECGHL  
SNSPRSATSAGQGNPSFGTSPSDGNGSVGGPLMSSAVNGQVSAVGSVGGRTNSSGFGSVTSDANSPAYHTYSTEIGLN  
DFDFFPSSTWDIVGGGETSPDGSSVNAAQSGWDRRPSRQSQSLTPVSTPNPRPPSGAGYSPSGVCASPLNPYVHQT  
SPAARVSTPAHPFANSFPFSPLEQEQPDGSGFCSDGTEESKSGVQESANVNGSSDGGGAPGDSGRRLRNLLLTQRQSTSA  
DEVSTGDAGGQVGDDVVRNRHRILKGLLNQDDDEDARSDEVPAGAGAAGRGSVGGRLQADAPRMSGHSSTGNM  
LLKLLNEKSDDDDDLEKRAGLKKQNELLQQLKEQDEESKPQVGPDTGQHRDDDPLLESGLFRNPSPSPPSGAGVGVDVT  
GSLTVSSLIGGRKRPSDDGDESGVSSAKMRLGGPSGAPPGVSRSGTAAGTSKLWERNKMLASLLAKEPSQPATIPPIPAS  
VISATPQEILPRVSKPQTPSWPSGNVQPPSSTAATARPTQQVTDVSRQQVRPQPNRPSATPFLNQMLTQQDHQQSN  
MLLQQSIQQQKVQQPSQQQQQQQQAQQQQVQSSQQQAQQQVQQQQQQQQQQQQQQQQVQQQRGQLNQLE  
SSFNIPVSGATTVDFRSVSGSGVSSPSTWDNQSSDPVLSDLLDQVIDIVPDDSSAIMNMMLDAMESSPNNSGYQQGLNE  
KMAIHAIQKSLMLCESAVKSPSSPTVSLPGTPPTYAASTMSNQTPQQGSFPPPPVYQRPRFGLPAGTTPVPGRPGAPQY  
GIGVLNQQALIQQRKILQQQQQKQRLQQQQQQQQLLIPSNATADQLPTGLQNIDSLNNTVAPNVSLQRSASVPDSQL  
SPNFGGQVLNSAASQISPGQRLNQPPYSPHSQLASPLGQQQVFSVPSTGMNSFSSGQQAQSRLSHPPTGLPSFQQ  
SQLSPRISQGGQPGYPVLTQGRPFQPRQQQQQQPSQQQQPQQLPPVRSASPGGAVVGPRQSPYQAEQFPPSSPG  
TTTGFQAQQGFQQQLRLQRTISAPSATTQLPGGVNHSRLYGKQELPHPALSPSEPVSHPFHPHGPPLPDPHHHHPHP  
LSHPPHHHHHHHHIPHHQQPQPQHHPHNPQSPQHHPVMYQAQPRPPPSQFCYDQPNFQLYGASERGRPQAHTPT  
NHQPGGGGGGGGNGGMTSEYVRQELRAIVGARQSNGGSSGGVGMTVSGQQRQLQLGPGQSVSAADLEAFGFVCE  
PPSTGTSDSPKLWGSIGSELSSGSPQAGFSSSRNPTEESPRPSDHKSLLQKLLSE\*
