# Supplementary material for: Crucial Role of Juvenile Hormone Receptor Components Methoprene-Tolerant and Taiman in Sexual Maturation of Adult Male Desert Locusts
Source: MDPI journal article supplement (doi:10.3390/biom11020244), 2021-02-09
Supplement: s1 [file s1]

MRNKAEKQRRDKLNSLITELAHVPMVAQSPRRMDKTSILRLSATFLRM YRCLPLKPGEIHEPFLPFLET LKVSQVLLDF  
QGMEGFMLVVTGAGKIVFVTHVTEKLLGHTQNDLLGQSLYNITRPEDHEELRRNIETAPSDGRASSAASGCSPALTSDES  
SCEDGAAGGSTPSSSPSASRPGTSASTASVGSSCDGGRAGLGGLFGSAGAAEHRRSFYIHLAQRAGGRAAGSGSATA  
GAGGGGGGGGGAAGQGAEQTTYELVHFLGYLQVPRSHEPPPATHRPRRHRDTPSSNSDNVLVAVVQLFREKKVME  
LSLLEATLDEYQTRHLKDGSIVYSDHRISVVAGYLADEVHGHNAFTFMHQDDMAYALIALQQMFDPKNEPFGSSTYRLVT  
KNGQYIYMRTRGYLEFAHGSKDVETFLCINTLLSKEEGEDGLREMKQRFSA YVSALRAAGADLSLAGIAAAMSAAPPPR  
MVKGSELPKLPPPPPPPPSLQPSSPSPLPPRPPPPPPPPQPPAITSLSPEIITNSTLCEVSPFTAMVTESAASSEQSAD  
VFGSVSRSEAAASKYRNQAPTAASRSPTVDPYLP AARPRAVSEGDDTTGFNLQNFVSLFKVPEEEENSVEVQLSPLANST  
GITTDLEEKEQLRNPLSPSSPPSRHPYTAAQRIRAASESELQTANSGSTFIQSDPASRGGNWQFPRPGDMPHSGTTERRP  
PERPTVITGRCCAGSERMKCSRLSVMSVTGDEKRITSVRGEVTVLKRTMSADVENPSTTKKLNVGPRYCRQRHRVEHPP  
TEALSVEVNTLPPDELQHILSRDSGMYNSQPTVLVSQHS LFRTSQPALQTVTQNVPASSLSPQLAEMQSTSVTPPSFI  
MEEPSGLPLVNLSDANTLSVGCQDPLISPDHGDSDSFSSLGLPD PENNPEVLDLLEASELKNFDTLQEVRS SNEPEAPSG  
PETAVTLERFLARKHLQLESCMQRQETQMHCIEHDLTQLPLADHVFRSNLTQLQASGPIHARKEERQASKLHIPVLTPIF  
MRNNIRSTRYC
