# Supplementary material for: Crucial Role of Juvenile Hormone Receptor Components Methoprene-Tolerant and Taiman in Sexual Maturation of Adult Male Desert Locusts
Source: MDPI journal article supplement (doi:10.3390/biom11020244), 2021-02-09
Supplement: s1 [file s1]

[illegible]

Figure 1: Multiple sequence alignment of PAS-11 protein from various species. The alignment is shown in blocks, with each block containing a table of coverage (cov) and identity (pid) percentages for the seven species, followed by the amino acid sequence alignment. The species are: 1 SgTai, 2 LmTai, 3 PkTai, 4 BgTai, 5 DmTai, 6 AaTai, and 7 MnTai.

**Block 1 (PAS-11):**

|         | cov    | pid    |
|---------|--------|--------|
| 1 SgTai | 100.0% | 100.0% |
| 2 LmTai | 99.9%  | 87.1%  |
| 3 PkTai | 84.4%  | 29.3%  |
| 4 BgTai | 90.8%  | 52.9%  |
| 5 DmTai | 92.7%  | 15.8%  |
| 6 AaTai | 87.1%  | 17.5%  |
| 7 MnTai | 90.8%  | 19.5%  |

**Block 2 (PAS-11):**

|         | cov    | pid    |
|---------|--------|--------|
| 1 SgTai | 100.0% | 100.0% |
| 2 LmTai | 99.9%  | 87.1%  |
| 3 PkTai | 84.4%  | 29.3%  |
| 4 BgTai | 90.8%  | 52.9%  |
| 5 DmTai | 92.7%  | 15.8%  |
| 6 AaTai | 87.1%  | 17.5%  |
| 7 MnTai | 90.8%  | 19.5%  |

**Block 3 (PAS-11):**

|         | cov    | pid    |
|---------|--------|--------|
| 1 SgTai | 100.0% | 100.0% |
| 2 LmTai | 99.9%  | 87.1%  |
| 3 PkTai | 84.4%  | 29.3%  |
| 4 BgTai | 90.8%  | 52.9%  |
| 5 DmTai | 92.7%  | 15.8%  |
| 6 AaTai | 87.1%  | 17.5%  |
| 7 MnTai | 90.8%  | 19.5%  |

**Block 4 (PAS-11):**

|         | cov    | pid    |
|---------|--------|--------|
| 1 SgTai | 100.0% | 100.0% |
| 2 LmTai | 99.9%  | 87.1%  |
| 3 PkTai | 84.4%  | 29.3%  |
| 4 BgTai | 90.8%  | 52.9%  |
| 5 DmTai | 92.7%  | 15.8%  |
| 6 AaTai | 87.1%  | 17.5%  |
| 7 MnTai | 90.8%  | 19.5%  |

**Block 5 (PAS-11):**

|         | cov    | pid    |
|---------|--------|--------|
| 1 SgTai | 100.0% | 100.0% |
| 2 LmTai | 99.9%  | 87.1%  |
| 3 PkTai | 84.4%  | 29.3%  |
| 4 BgTai | 90.8%  | 52.9%  |
| 5 DmTai | 92.7%  | 15.8%  |
| 6 AaTai | 87.1%  | 17.5%  |
| 7 MnTai | 90.8%  | 19.5%  |

**Block 6 (PAS-11):**

|         | cov    | pid    |
|---------|--------|--------|
| 1 SgTai | 100.0% | 100.0% |
| 2 LmTai | 99.9%  | 87.1%  |
| 3 PkTai | 84.4%  | 29.3%  |
| 4 BgTai | 90.8%  | 52.9%  |
| 5 DmTai | 92.7%  | 15.8%  |
| 6 AaTai | 87.1%  | 17.5%  |
| 7 MnTai | 90.8%  | 19.5%  |

**Block 7 (PAS-11):**

|         | cov    | pid    |
|---------|--------|--------|
| 1 SgTai | 100.0% | 100.0% |
| 2 LmTai | 99.9%  | 87.1%  |
| 3 PkTai | 84.4%  | 29.3%  |
| 4 BgTai | 90.8%  | 52.9%  |
| 5 DmTai | 92.7%  | 15.8%  |
| 6 AaTai | 87.1%  | 17.5%  |
| 7 MnTai | 90.8%  | 19.5%  |

**Block 8 (PAS-11):**

|         | cov    | pid    |
|---------|--------|--------|
| 1 SgTai | 100.0% | 100.0% |
| 2 LmTai | 99.9%  | 87.1%  |
| 3 PkTai | 84.4%  | 29.3%  |
| 4 BgTai | 90.8%  | 52.9%  |
| 5 DmTai | 92.7%  | 15.8%  |
| 6 AaTai | 87.1%  | 17.5%  |
| 7 MnTai | 90.8%  | 19.5%  |

**Block 9 (PAS-11):**

|         | cov    | pid    |
|---------|--------|--------|
| 1 SgTai | 100.0% | 100.0% |
| 2 LmTai | 99.9%  | 87.1%  |
| 3 PkTai | 84.4%  | 29.3%  |
| 4 BgTai | 90.8%  | 52.9%  |
| 5 DmTai | 92.7%  | 15.8%  |
| 6 AaTai | 87.1%  | 17.5%  |
| 7 MnTai | 90.8%  | 19.5%  |

**Block 10 (PAS-11):**

|         | cov    | pid    |
|---------|--------|--------|
| 1 SgTai | 100.0% | 100.0% |
| 2 LmTai | 99.9%  | 87.1%  |
| 3 PkTai | 84.4%  | 29.3%  |
| 4 BgTai | 90.8%  | 52.9%  |
| 5 DmTai | 92.7%  | 15.8%  |
| 6 AaTai | 87.1%  | 17.5%  |
| 7 MnTai | 90.8%  | 19.5%  |

**Block 11 (PAS-11):**

|         | cov    | pid    |
|---------|--------|--------|
| 1 SgTai | 100.0% | 100.0% |
| 2 LmTai | 99.9%  | 87.1%  |
| 3 PkTai | 84.4%  | 29.3%  |
| 4 BgTai | 90.8%  | 52.9%  |
| 5 DmTai | 92.7%  | 15.8%  |
| 6 AaTai | 87.1%  | 17.5%  |
| 7 MnTai | 90.8%  | 19.5%  |

**Block 12 (PAS-11):**

|         | cov    | pid    |
|---------|--------|--------|
| 1 SgTai | 100.0% | 100.0% |
| 2 LmTai | 99.9%  | 87.1%  |
| 3 PkTai | 84.4%  | 29.3%  |
| 4 BgTai | 90.8%  | 52.9%  |
| 5 DmTai | 92.7%  | 15.8%  |
| 6 AaTai | 87.1%  | 17.5%  |
| 7 MnTai | 90.8%  | 19.5%  |

**Block 13 (PAS-11**
