# Supplementary material for: Crucial Role of Juvenile Hormone Receptor Components Methoprene-Tolerant and Taiman in Sexual Maturation of Adult Male Desert Locusts
Source: MDPI journal article supplement (doi:10.3390/biom11020244), 2021-02-09
Supplement: s1 [file s1]

>MK855050.1 Schistocerca gregaria methoprene-tolerant protein (Met) mRNA,  
partial cds

GGCCGGCCAGGGCGCCGAGCAGACGACGTACGAGCTGGTTCACTTCCTCGGCTACCTGCAGGTCCCGCGG  
TCACACGAGCCGCCGCCGCCACGCACCGCCCGCGCCGACACCGCGACACAGTTCCAAGTAGCAACAGTG  
ATAATGTCCTGGTTGCTGTCTGTCCTCAACTGTTTCGGGAGAAAAAGTCATGGAGTTATCTCTCCTGGAGGC  
AACACTGGATGAGTACCAAACGAGGCATCTAAAAGATGGCAGTATTGTGTATTCAGATCACAGAATATCT  
GTTGTGGCCGGATATCTGGCAGATGAGGTTACGGTCATAATGCATTACGTTTATGCATCAGGATGACA  
TGGCATACGCCTTAATAGCCCTTCAGCAGATGTTTGACAAGAATGAGCCGTTTGGCAGTTCCACTTACAG  
GCTCGTTACAAAAAATGGGCAATACATTTATATGAGAACAAGAGGCTATTTAGAGTTTGCACATGGATCA  
AAAGATGTGGAGACATTTTTGTGCATTAACACACTTCTGTCTGAAAGAAGAAGGTGAAGATGGGCTGCGGG  
AGATGAAGCAGCGCTTCTCTGCTTATGTCTCTGCACTGAGAGCTGCTGGAGCTGACTTGTCTTGGCTGG  
CATTGCCGCTGCTATGAGTGCTGCACCGCCCCACCCCGGATGGTGAAAGGTTCTGAGCTTCCCAAACCTG  
CCACCCCCACCCCGCCCCACCACCATCTTTCAGCCATCATCGCCATCACCCTGCCACCACCACGGC  
CACCACCACCACCACCACAACCACCTGCAGCAATCACGTCAATTGTCTATCGCCTGAGATTATAACTAA  
TTCAACTCTCTGTGAAGTGTCTCCGCCCTTCACAGCAATGGTGACAGAGAGTGCAGCTAGCTCAGAGCAG  
AGTGACAGATGTCTTTGGCAGTGTTCACGCTCAGAAGCAGCAGCAAGCAAATACAGAAACCAAGCACCAA  
CAGCAGCTTCCAGATCACCTACAGTGGATCCATATCTTCCAGCAGCAAGACCTCGTGCAGTTTCTGAAGG  
AGATGACACTACTGGATTCAATTTACAGAATTTTGTAAGTCTCTTCAAAGGTGCCTGAAGAGGAAGAAAAT  
AGTGTGAAGTTCAGCTGTCACCTCTTGCCAATAGTACTGGCATTACCACAGACTTAGAAGAAAAAGAAC  
AGCTCAGAAATCCACTTTCTCCTTCATCACCTCCATCGAGGCACCCATACACCGCTGCCCAGAGGATTAG  
GGCAGCATCAGAAAGTGAACACAGACTGCCAATAGTGGATCGACTTTTATTCAGTCAGATCCAGCGAGC  
AGAGGGGGCAACTGGCAGTTTCCGAGGCCCCGAGACATGCCTCATTCGGGAACCTACGGAGAGAAGGCCCC  
CGGAAAGACCTACGGTTATTACCGGACGGTGTCTGTCTGGATCTGAGAGGATGAAGTGCAGTAGATTGTC  
AGTTATGTCAGTCACAGGAGATGAGAAGAGGATTACCAGTGTGCGTGGTGAAGTTACTGTGTAAAAAGG  
ACTATGAGTGCAGATGTAGAAAATCCGAGCACTACAAAGAACTGAATGTTGGACCCCGGTACTGTAGGC  
AGCGGCACAGAGTTGAGCATCCTCCTACGGAAGCTCTGAGTGTGGAAGTAAATACACTTCCGCCCCGATGA  
ACTGCAGCATATAATATTGTCTGAGGGACAGTGGCATGTACAATTCGCAGCCAACAGTTCTCGTATCACAG  
CACAGCCTGTTTCGGACATCACAGCCAGCACTTCAGACTGTGACACAAAATGTGCCTGCATCTTCTTTGA  
GCCCCCTCAATTAGCCGAAATGCAGAGCACGTCTGTTACACCACCATCGTTTATTATGGAAGAACCCTAG  
TGGCCTGCCTCTTGTGAACCTAAGTGATGCCAACACCTTATCAGTTGGTTGCCAGGATCCTCTTATCAGC  
CCTGATCATGGAGACAGTGACTCATTTTCATCTCTAGGATTACCTGATCCAGAGAATAATCCAGAGGTCT  
TAGACCTGTTAGAAGCATCTGAACGAAGCTAAATTTTGACACATTGCAAGAGGTGCGCAGTAGCAACGA  
ACCAGAAGCACCTTCCGGACCGGAGACTGCAGTCACTCTGGAGCGCTTCTGGCACGCAAACACCTACAA  
CTCGAGTCGTGCATGCAGCGACAGGAAACACAGATGCATGCATCGAGCACGACCTGACTCAGCTCCCAT  
TGGCAGACCATGTGTTCCGCTCAAACCTCACACAACCTGCAGGCAAGTGGCCCGATACATGCCAGGAAGGA  
AGAGAGACAAGCTTCAAAATTACACATTCCTGTCTTCACACCTATATTTATGAGGAACAACATAAGAAGC  
ACCAGATACTGCTGA
