# Supplementary material for: Crucial Role of Juvenile Hormone Receptor Components Methoprene-Tolerant and Taiman in Sexual Maturation of Adult Male Desert Locusts
Source: MDPI journal article supplement (doi:10.3390/biom11020244), 2021-02-09
Supplement: s1 [file s1]

>MK442071.1 Schistocerca gregaria Tai protein mRNA, partial cds  
ATGTCAACAGTCATCGCTGAAAATGCGGGGCTTGGCCCATGTGACCTCCAGGACCCTGTGTGGGTCAAGA  
TGAGCGCTGCCGTCACCTGGAGGCGCCAGTAAGAAACGCAAGAAAACCTGACACCAAGTCCAGCGCCCAGGT  
TACGAAGTGCCTTAATGAGAAGAGACGACGTGATCAAGAGAACACATTCTATGAAGAGCTGGCTGAGCTG  
ATTGCTGCCAGCTTTGCTGACATGAACTCACTCTCTGTGAAACCGGACAAGTGCGCCATCCTCCAGGAAA  
CTGTAACCCAGATACGCCGAATTAAGGAACAGGAGGGTGCAGAGCAGTGATGCCATTCAGCAGGGTGAAGT  
TTCATCATCAAAGCCTACTATTCTAGCTAATGAAGTACTTGGTCCACTACTGCTGCAGGCTCTTGATGGA  
TTTTTATTTGTTGTGAACAAAGACTGCCATGTGGAGTACGCTCGGAGAATGTGGAGCAGTTTATTAAGT  
ACACCAAGGAAGATATTCTTGGGAAAAGTATTTATAATTTTCATGCATGTGGGAGACACAACACGTTTCAG  
TTCCATACTTTTGCCAATTACTTCCACAGCTTGGTCTGGCGAACATCAACCTCACAGGAACCGTACAATT  
AACTGCCGCTTGTTAATCAAACCCCCAGATGATGCTGATGAAACTATGGAAGAGAAAACAACAGCGTATAA  
GCAAGTATGAGTATATGCAGATCTCATCTACTTTGCTTCCGTATCCAAGTGATCGTTCTGAGAGTGGTGA  
CCTGAGTGAGTCAATTGATAGTAGCCCGTGTCTTATGTGTGTTGCTCGTCGTATACCACAAAATGAAAAA  
TCTCTCCCCAACGCAGTTGAACAGTTCAGCATGAAGCTTGATGTGCATGGCAAAATAGTAGGAGTTGACA  
CAACAAATATTTACCTAGTTACTCGCAGTTTTTAAACAAGGATCTGGCAGGCCGTGTCATACAGGATCT  
TTGCCATCAGCAAGACTTGCAGAAGCTGACAAGTCATTTAAGGGAGGCTGTGCAAACCTGGTCACAATACA  
AGTAAAATATACAGACTACGTGTGAAGACTCCTGATAAGTACATTCAAGTTCAGACAAAATCAAGGCTAT  
TTCAGAACCCTAATGACCAGGAGGATTTTCATCATGGCAACACACTCTATTATTGGAGACTCTGAGAACCC  
TCTTCCGGAGTGTGGCCACCTCTCCAACCTCTC
