# Supplementary material for: Crucial Role of Juvenile Hormone Receptor Components Methoprene-Tolerant and Taiman in Sexual Maturation of Adult Male Desert Locusts
Source: Biomolecules. 2021 Feb 9;11(2):244. doi: 10.3390/biom11020244 (PMC7915749; doi:10.3390/biom11020244)
Supplement: Supplementary file 1 [file biomolecules-11-00244-s001.zip]

Archive with 14 entries (14 files):
- SupplementaryFiles/Supp_Figure_Captions-BIOM_revised.docx
- SupplementaryFiles/Supp_Figure_Captions-BIOM_revised.pdf
- SupplementaryFiles/Supp_Table_BIOM_revised.docx
- SupplementaryFiles/Supp_Table_BIOM_revised.pdf
- SupplementaryFiles/SuppFig1.pdf
- SupplementaryFiles/SuppFig10.pdf
- SupplementaryFiles/SuppFig2_Met.pdf
- SupplementaryFiles/SuppFig3.pdf
- SupplementaryFiles/SuppFig4.pdf
- SupplementaryFiles/SuppFig5_Taiman.pdf
- SupplementaryFiles/SuppFig6.pdf
- SupplementaryFiles/SuppFig7.pdf
- SupplementaryFiles/SuppFig8.pdf
- SupplementaryFiles/SuppFig9.pdf
