# Supplementary figures and images for: Crucial Role of Juvenile Hormone Receptor Components Methoprene-Tolerant and Taiman in Sexual Maturation of Adult Male Desert Locusts
Source: MDPI journal article supplement (doi:10.3390/biom11020244), 2021-02-09

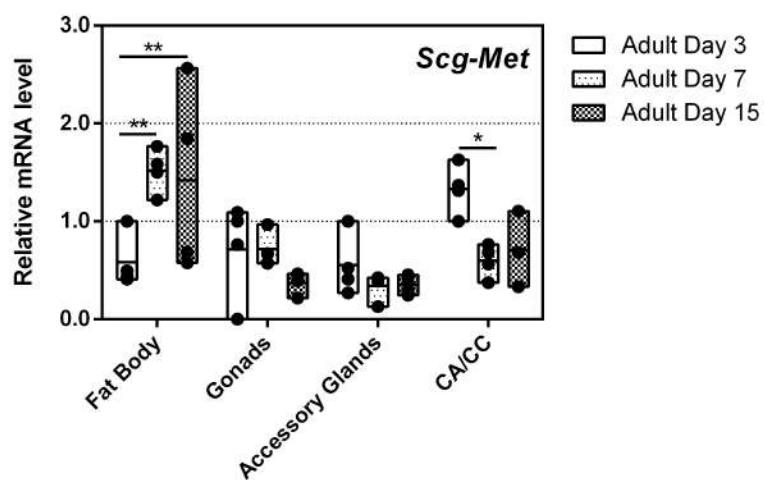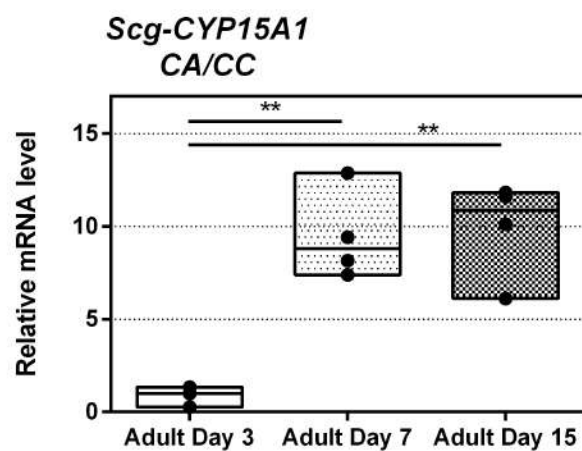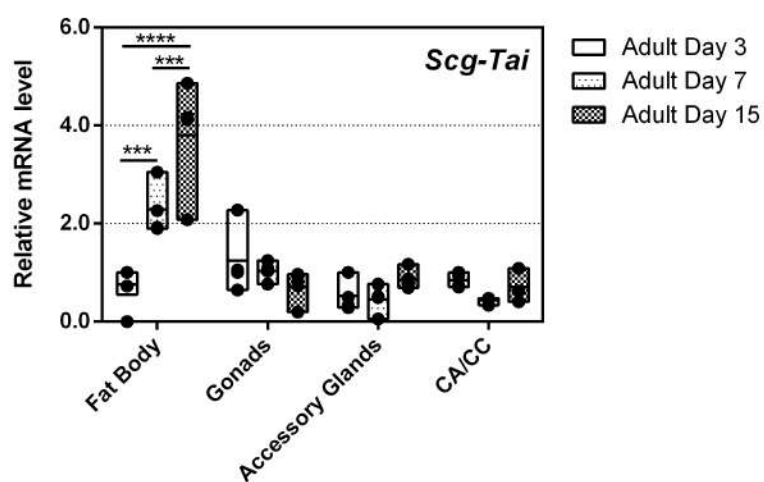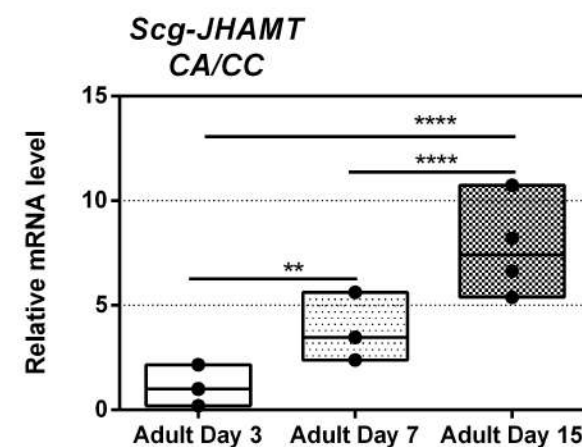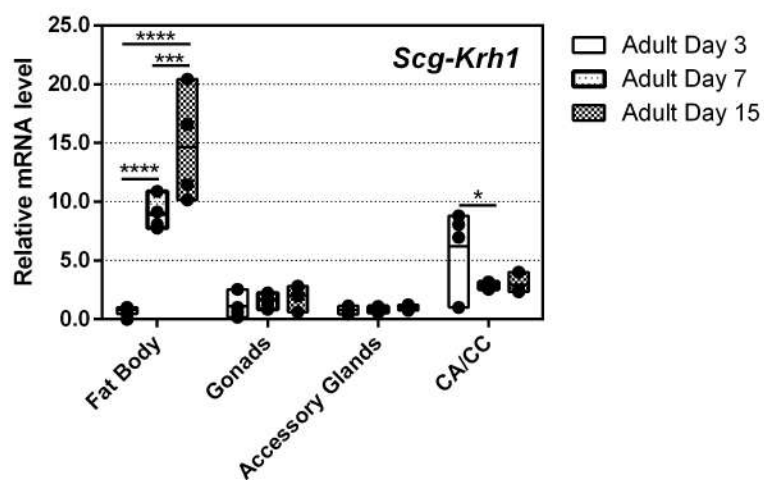

Supplement: s1 [file s1]

Control

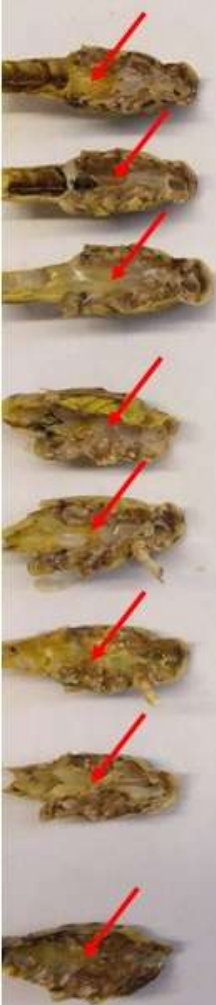

ds Mek

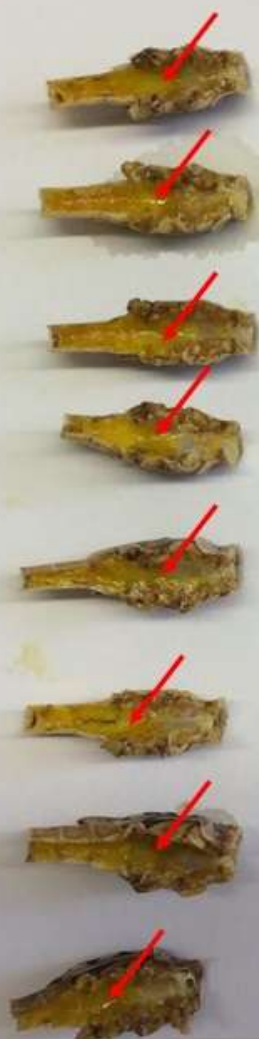

ds Tai

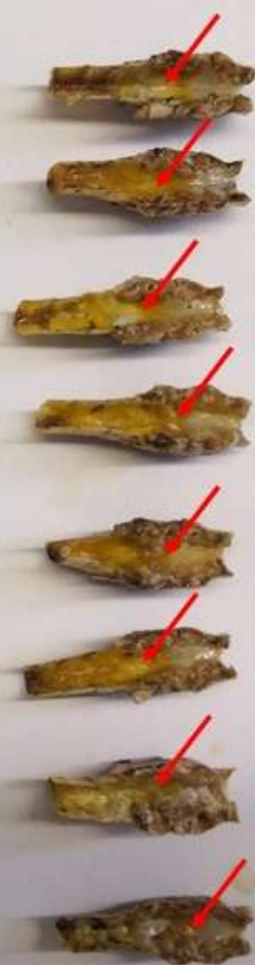

Supplement: s1 [file s1]

Tree scale: 1

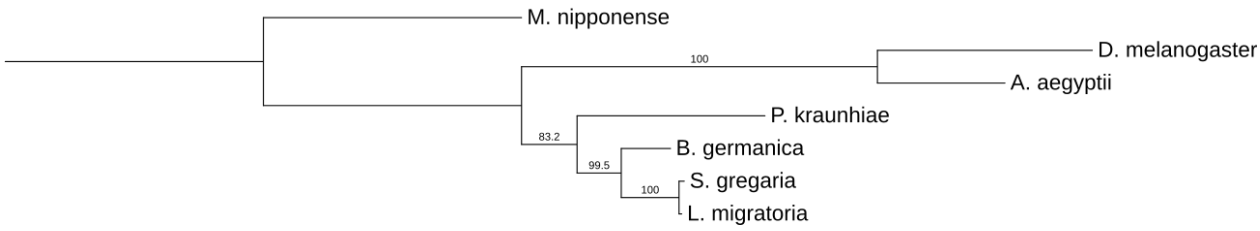

Supplement: s1 [file s1]

Tree scale: 1

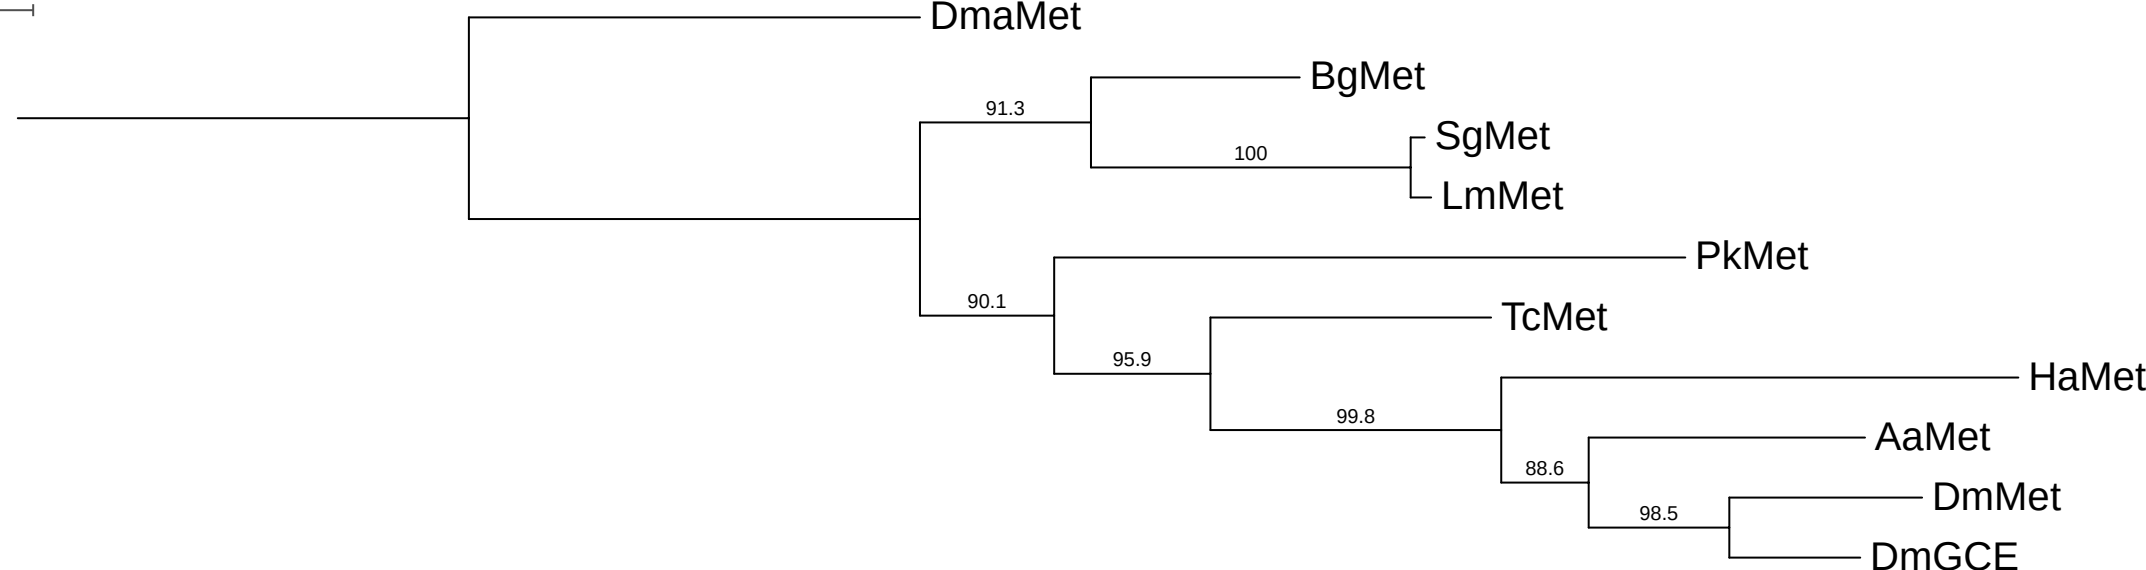

Supplement: s1 [file s1]
